# Supplementary material
Source: Springer Nature journal article supplement (https://www.springermedizin.de/resource/supplementary/12919_2011_39_MOESM1_ESM.pdf/9654332)
Supplement: MOESM1 [file 9654332]

## Curray grammar

In this section we present the CFG for all Curray statements. In the CFG below anything that begins with lower case letters are considered as non-terminals and anything all capitals are considered as terminals,

*curray* : (*statement*;)\*

*statement* : ( *createTable* |*compute* |*extract* |*expressionView* )

*createTable* : CREATE *tableType* *tableName* [ FORMAT *format* ]

lCurlyBrace *parameterList* rCurlyBrace

[ primaryKey ,

( foreignKey , )\*

REQUIRED SUBTABLES (*tableName*)+ ]

*tableType* : EXPRESSIONTABLE |LIMSTABLE

*format* : AGILENT |AFFYMETRIX |MAGEML

*primaryKey* : PRIMARY KEY lBrace *identifier*+ rBrace

*foreignKey* : FOREIGN KEY lBrace *identifier*+ rBrace

REFERENCES *tableName* lBrace *identifier*+ rBrace

*parameterList* : *identifier* *dataType* [, *parameterList*]

*compute* : *computeSimple* |*computeRollup*

*computeSimple* : COMPUTE *attribute*+ |all

FROM *source*

WHERE *conditions*

[ GROUP BY *attribute*+ ]

[ HAVING *conditions* ]

[USING ( LIBRARY *libraryName* |FUNCTION *functionName* ) ]

*computeRollup* : COMPUTE *attribute*+

FROM ROLLUP *source* TO (*expressionTable* |*format*)

[ USING (LIBRARY *libraryName* |FUNCTION *functionName*)

WHERE *conditions*]

*conditions* : *identifier* *operator* *values*

|*functionName* lBrace *attribute*\* rBrace

|*identifier* *operator* *conditions*

*extract* : EXTRACT INTO *tableName*

FROM *source*  
WHERE *conditions*  
USING FUNCTION *functionName*  
*expressionView* : CREATE EXPRESSIONVIEW *viewName* AS *compute*  
*operator* : = |<|>|≤|≥  
*all* : \*  
*identifier*  
*tableName*  
*viewName*  
*source*  
*attribute*  
*functionName*  
*libraryName*  
*expressionTable* : *literal*  
*lBrace* : (  
*rBrace* : )  
*lCurlyBrace* : {  
*rCurlyBrace* : }  
*values* : *alpha-numeric-string*  
*dataType* : *sql-data-types*

## Translation algorithms

---

**Algorithm 1** CreateTable

---

**INPUT:** *table, type, format, params, pKey, fKey, rTables*

**OUTPUT:** *sql* — An SQL statement

```
fParams := loadFormat(format)
if fParam  $\subset$  params then
  if rTables  $\neq$   $\emptyset$  then
    invalid := validate(rTables)
    if invalid = TRUE then
      return Required Tables Not Initialized
    end if
  end if
  sql = create table table (
  for p  $\in$  params do
    sql += p
  end for
  sql += )
  if pKey  $\neq$  "" then
    sql += pKey
  end if
  if fKey  $\neq$  "" then
    sql += fKey
  end if
  return sql
else
  return Format Mismatch
end if
```

---

---

**Algorithm 2** Extract

---

**INPUT:** *table, condition, source, fName, fAttributes*

**OUTPUT:** *sql* — An SQL statement

```
executeSQL( call source destTable fAttributes)
attributes := getColumnns( destTable)
sql := insert into table (
for p ∈ attributes do
    sql += p
end for
sql += )
sql += select
for p ∈ attributes do
    sql += p
end for
sql += from destTable
sql += where condition
return sql
```

---

---

**Algorithm 3** ComputeSimple

---

**INPUT:** *outAttributes, source, wCondition, gAttributes, hCondition, fName, fAttributes*

**OUTPUT:** *sql* — An SQL statement

```
script := extractScript( fName)
script := updateScript( fAttributes)
destTable := runScript(script)
sql += select
for p ∈ outAttributes do
    sql += p
end for
sql += from destTable
sql += where wCondition
sql += having hCondition
sql += group by
for p ∈ gAttributes do
    sql += p
end for
return sql
```

---

---

**Algorithm 4** ComputeRollup

---

**INPUT:** *attributes, source, format, condition, fName*

**OUTPUT:** *sql* — An SQL statement

```
script := exteactScript( fName)
script := updateScript( source, format)
destTable := runScript(script)
sql += select
for p ∈ attributes do
    sql += p
end for
sql += from destTable
sql += where condition
return sql
```

---

---

**Algorithm 5** ExpressionView

---

**INPUT:** *viewName, source*

**OUTPUT:** *sql* — An SQL statement

```
attributes := getColumnns(source)
sql := create view viewName (
for p ∈ attributes do
    sql += p
end for
sql += ) as
sql += select
for p ∈ attributes do
    sql += p
end for
sql += from source
return sql
```

---
